# Supplementary material for: Nivolumab plus relatlimab in patients with previously treated microsatellite instability-high/mismatch repair-deficient metastatic colorectal cancer: the phase II CheckMate 142 study
Source: PubMed Central journal article supplement — J Immunother Cancer. 2024 May 31;12(5):e008689. doi: 10.1136/jitc-2023-008689 (PMC11149130; doi:10.1136/jitc-2023-008689), 2024-05-31

## Supplementary Appendix

This appendix has been provided by the authors to give readers additional information about their work. Supplement to: Overman, Gelsomino, Aglietta, et al. Nivolumab plus relatlimab for patients with previously treated microsatellite instability high/mismatch repair-deficient metastatic colorectal cancer: the phase 2 CheckMate 142 study

## Table of Contents

|                                                                                                                                                                                                                                                                                                                                |          |
|--------------------------------------------------------------------------------------------------------------------------------------------------------------------------------------------------------------------------------------------------------------------------------------------------------------------------------|----------|
| <b>List of Sites and Investigators .....</b>                                                                                                                                                                                                                                                                                   | <b>2</b> |
| <b>Tables and Figures .....</b>                                                                                                                                                                                                                                                                                                | <b>3</b> |
| <b>Table S1</b> ORR in subgroups per investigator .....                                                                                                                                                                                                                                                                        | 3        |
| <b>Table S2</b> Characteristics of patients who progressed after achieving disease control .....                                                                                                                                                                                                                               | 5        |
| <b>Table S3</b> ORR, BOR, DCR per investigator by tumor cell PD-L1 expression and LAG-3 expression.....                                                                                                                                                                                                                        | 6        |
| <b>Figure S1</b> A) Kaplan-Meier curve of progression-free survival per investigator by baseline LAG-3 status. B) Kaplan-Meier curve of overall-survival per investigator by baseline LAG-3 status. Symbols represent censored observations. LAG-3, lymphocyte-activation gene 3.....                                          | 7        |
| <b>Figure S2</b> A) Kaplan-Meier curve of progression-free survival per investigator by baseline tumor cell PD-L1 expression status. B) Kaplan-Meier curve of overall-survival per investigator by baseline tumor cell PD-L1 expression status. Symbols represent censored observations. PD-L1, programmed death ligand 1..... | 9        |

## List of Sites and Investigators

Principal investigators for each site who participated in this trial (Cohort 5).

| <b>Country</b> | <b>Principal investigator</b> |
|----------------|-------------------------------|
| Australia      | Andrew Hill                   |
|                | Mark Wong                     |
| Belgium        | Eric Van Cutsem               |
| Canada         | Albiruni Abdul Razak          |
| Ireland        | Gregory Leonard               |
| Italy          | Massimo Aglietta              |
|                | Elisabetta Fenocchio          |
|                | Fabio Gelsomino               |
|                | Sara Lonardi                  |
|                | Gabriele Luppi                |
|                | Vittorina Zagonel             |
| Spain          | Antonio Cubillo Gracian       |
|                | Pilar Garcia Alfonso          |
|                | Rocio Garcia Carbonero        |
|                | Reyes Gonzales                |
|                | Maria Luisa Limon Miron       |
| United States  | Olatunji Alese                |
|                | Maria Diab                    |
|                | Bassel El-Rayes               |
|                | Heinz-Josef Lenz              |

## Tables and Figures

**Table S1** ORR in subgroups per investigator

|                                     | <b>Objective response rate<br/>n (%)*<br/>[95% CI]<br/>(N=50)</b> |
|-------------------------------------|-------------------------------------------------------------------|
| Median age, years                   |                                                                   |
| <65 (n=34)                          | 14 (41)<br>[24.6 to 59.3]                                         |
| ≥65 (n=16)                          | 11 (69)<br>[41.3 to 89.0]                                         |
| ≥65 and <75 (n=10)                  | 6 (60)<br>[26.2 to 87.8]                                          |
| ≥75 (n=6)                           | 5 (83)<br>[35.9 to 99.6]                                          |
| Sex                                 |                                                                   |
| Male (n=28)                         | 13 (46)<br>[27.5 to 66.1]                                         |
| Female (n=22)                       | 12 (55)<br>[32.2 to 75.6]                                         |
| ECOG performance status             |                                                                   |
| 0 (n=35)                            | 20 (57)<br>[39.4 to 73.7]                                         |
| 1 (n=15)                            | 5 (33)<br>[11.8 to 61.6]                                          |
| Clinical history of Lynch syndrome† |                                                                   |
| Yes (n=8)                           | 4 (50)<br>[15.7 to 84.3]                                          |
| No (n=16)                           | 7 (44)<br>[19.8 to 70.1]                                          |
| Unknown (n=26)                      | 14 (54)<br>[33.4 to 73.4]                                         |
| Mutation status                     |                                                                   |
| <i>KRAS/BRAF</i> wild type (n=15)   | 9 (60)<br>[32.3 to 83.7]                                          |
| <i>BRAF</i> mutation (n=12)         | 8 (67)<br>[34.9 to 90.1]                                          |
| <i>KRAS</i> mutation (n=17)         | 6 (35)<br>[14.2 to 61.7]                                          |
| <i>KRAS/BRAF</i> mutation (n=1)     | 0<br>[0.0 to 97.5]                                                |
| Unknown (n=5)                       | 2 (40)<br>[5.3 to 85.3]                                           |

|                                             | <b>Objective response rate<br/>n (%)*<br/>[95% CI]<br/>(N=50)</b> |
|---------------------------------------------|-------------------------------------------------------------------|
| <b>Number of prior systemic treatments†</b> |                                                                   |
| 0 (n=4)                                     | 3 (75)<br>[19.4 to 99.4]                                          |
| 1 (n=11)                                    | 8 (73)<br>[39.0 to 94.0]                                          |
| 2 (n=16)                                    | 8 (50)<br>[24.7 to 75.3]                                          |
| 3 (n=15)                                    | 6 (40)<br>[16.3 to 67.7]                                          |
| ≥4 (n=4)                                    | 0<br>[0.0 to 60.2]                                                |
| <b>Liver metastases</b>                     |                                                                   |
| Yes (n=18)                                  | 7 (39)<br>[17.3 to 64.3]                                          |
| No (n=32)                                   | 18 (56)<br>[37.7 to 73.6]                                         |
| <b>Neutrophil-to-lymphocyte ratio§</b>      |                                                                   |
| <3 (n=22)                                   | 11 (50)<br>[28.2 to 71.8]                                         |
| ≥3 (n=28)                                   | 14 (50)<br>[30.6 to 69.4]                                         |

\*All patients had stage IV disease at study entry.

†Lynch syndrome designation was based on the clinical records of patients at sites in countries where this reporting was permitted.

‡Some patients may have been treated with more than one type of therapy.

§Neutrophil-to-lymphocyte ratio was derived by dividing absolute neutrophil count by absolute lymphocyte count.

CI, confidence interval; ECOG, Eastern Cooperative Oncology Group; ORR, objective response rate.

## CheckMate 142 C5 Manuscript Final Draft

**Table S2** Characteristics of patients who progressed after achieving disease control

| Patient | Best overall response | KRAS mutation | BRAF mutation | Lynch syndrome | Local MSI test result | Duration of response, months | Time from first dose to progression, months | Treatment status at time of progression | Type of progression site | Organ with metastatic site progression               |
|---------|-----------------------|---------------|---------------|----------------|-----------------------|------------------------------|---------------------------------------------|-----------------------------------------|--------------------------|------------------------------------------------------|
| 1       | PR                    | Wildtype      | Wildtype      | Yes            | MSI-H                 | 33.1                         | 35.7                                        | On treatment                            | Target                   | Lymph node                                           |
| 2       | SD                    | Mutant        | Not Reported  | Unknown        | MSI-H                 | NA                           | 4.1                                         | Off treatment                           | Target New               | Peritoneum<br>Peritoneum                             |
| 3       | SD                    | Mutant        | Not reported  | Yes            | MSI-H                 | NA                           | 44.0                                        | Off treatment                           | Target                   | Pelvis                                               |
| 4       | SD                    | Unknown       | Mutant        | Unknown        | Unknown               | NA                           | 4.4                                         | Off treatment                           | Target New               | Liver, peritoneum, lymph node<br>Spleen              |
| 5       | SD                    | Wildtype      | Wildtype      | Yes            | MSI-H                 | NA                           | 28.3                                        | On treatment                            | Target                   | Lung, lymph node                                     |
| 6       | PR                    | Wildtype      | Wildtype      | No             | MSI-H                 | 13.8                         | 16.9                                        | Off treatment                           | Target New               | Peritoneum, lymph node<br>Lung                       |
| 7       | SD                    | Wildtype      | Mutant        | No             | MSI-H                 | NA                           | 5.3                                         | Off treatment                           | Target New               | Lung, liver, lymph node,<br>peritoneum<br>Peritoneum |
| 8       | PR                    | Wildtype      | Mutant        | No             | MSI-H                 | 42.7                         | 44.1                                        | Off treatment                           | Target New               | Lymph node<br>Oblique transverse muscle              |
| 9       | PR                    | Wildtype      | Wildtype      | No             | MSI-H                 | 46.2                         | 47.6                                        | Off treatment                           | Target New               | Pericardium<br>Peritoneum                            |
| 10      | PR                    | Wildtype      | Wildtype      | Unknown        | MSI-H                 | 27.1                         | 43.7                                        | Off treatment                           | Target                   | Peritoneum                                           |
| 11      | PR                    | Wildtype      | Wildtype      | Unknown        | MSI-H                 | 32.9                         | 35.7                                        | Off treatment                           | Target                   | Lung, liver, lymph node                              |
| 12      | PR                    | Mutant        | Wildtype      | Unknown        | MSI-H                 | 29.5                         | 30.9                                        | Off treatment                           | Target                   | Lung, peritoneum                                     |
| 13      | SD                    | Wildtype      | Mutant        | No             | MSI-H                 | NA                           | 8.2                                         | Off treatment                           | Target New               | Peritoneum<br>Lymph node                             |
| 14      | PR                    | Wildtype      | Mutant        | No             | MSI-H                 | 2.8                          | 5.5                                         | On treatment                            | Target New               | Subcutaneous<br>Lymph node                           |
| 15      | PR                    | Wildtype      | Mutant        | Unknown        | MSI-H                 | 26.3                         | 27.5                                        | On treatment                            | Target                   | Liver, urethra                                       |
| 16      | PR                    | Unknown       | Mutant        | Unknown        | MSI-H                 | 27.7                         | 30.6                                        | On treatment                            | Target New               | Lymph node, other<br>Lymph node                      |
| 17      | SD                    | Mutant        | Wildtype      | Unknown        | MSI-H                 | NA                           | 2.4                                         | Off treatment                           | New                      | Central nervous system                               |

MSI-H, microsatellite instability high; NA, not applicable; PR, partial response; SD, stable disease.

## CheckMate 142 Cohort 5 Manuscript – Final Draft

**Table S3** ORR, BOR, and DCR per investigator by tumor cell PD-L1 expression and LAG-3 expression

|                                 | Tumor cell PD-L1 expression |               | LAG-3 expression |               |
|---------------------------------|-----------------------------|---------------|------------------|---------------|
|                                 | ≥1%<br>(n=3)                | <1%<br>(n=24) | ≥1%<br>(n=8)     | <1%<br>(n=14) |
| Objective response rate, n (%)  | 1 (33)                      | 15 (63)       | 5 (63)           | 5 (36)        |
| 95% CI                          | 0.8 to 90.6                 | 40.6 to 81.2  | 24.5 to 91.5     | 12.8 to 64.9  |
| Confirmed best overall response |                             |               |                  |               |
| Complete response, n (%)        | 1 (33)                      | 1 (4)         | 2 (25)           | 0             |
| Partial response, n (%)         | 0                           | 14 (58)       | 3 (38)           | 5 (36)        |
| Stable disease, n (%)           | 1 (33)                      | 6 (25)        | 2 (25)           | 5 (36)        |
| Progressive disease, n (%)      | 1 (33)                      | 3 (13)        | 1 (13)           | 4 (29)        |
| Unable to determine             | 0                           | 0             | 0                | 0             |
| Disease control rate,* n (%)    | 2 (67)                      | 20 (83)       | 7 (88)           | 9 (64)        |
| 95% CI                          | 9.4 to 99.2                 | 62.6 to 95.3  | 47.3 to 99.7     | 35.1 to 87.2  |

\*Complete response plus partial response plus stable disease (for at least 12 weeks); CI based on the Clopper-Pearson method.

BOR, best overall response; CI, confidence interval; DCR, disease control rate; LAG-3, lymphocyte-activation gene 3; ORR, objective response rate; PD-L1, programmed death ligand 1.

## CheckMate 142 Cohort 5 Manuscript – Final Draft

**Figure S1** A) Kaplan-Meier curve of progression-free survival per investigator by baseline LAG-3 status. B) Kaplan-Meier curve of overall survival per investigator by baseline LAG-3 status. Symbols represent censored observations. LAG-3, lymphocyte-activation gene 3.

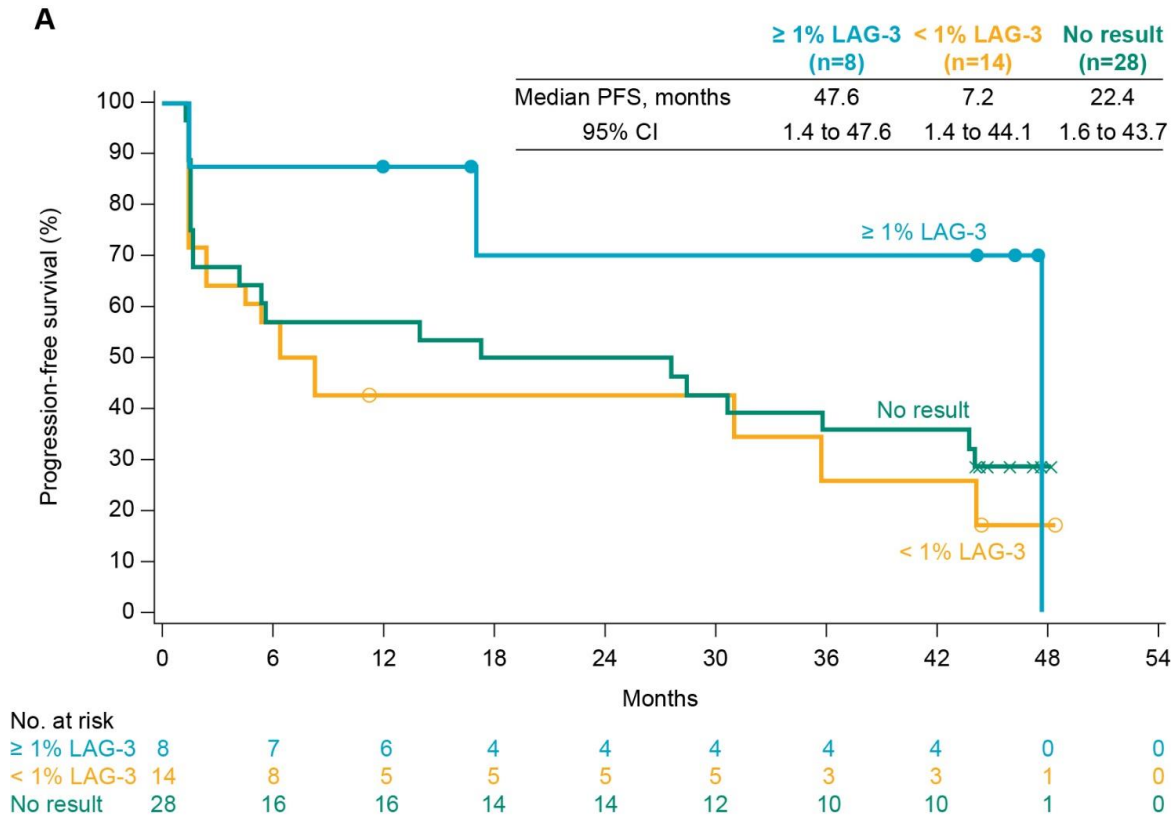

**CheckMate 142 Cohort 5 Manuscript – Final Draft**

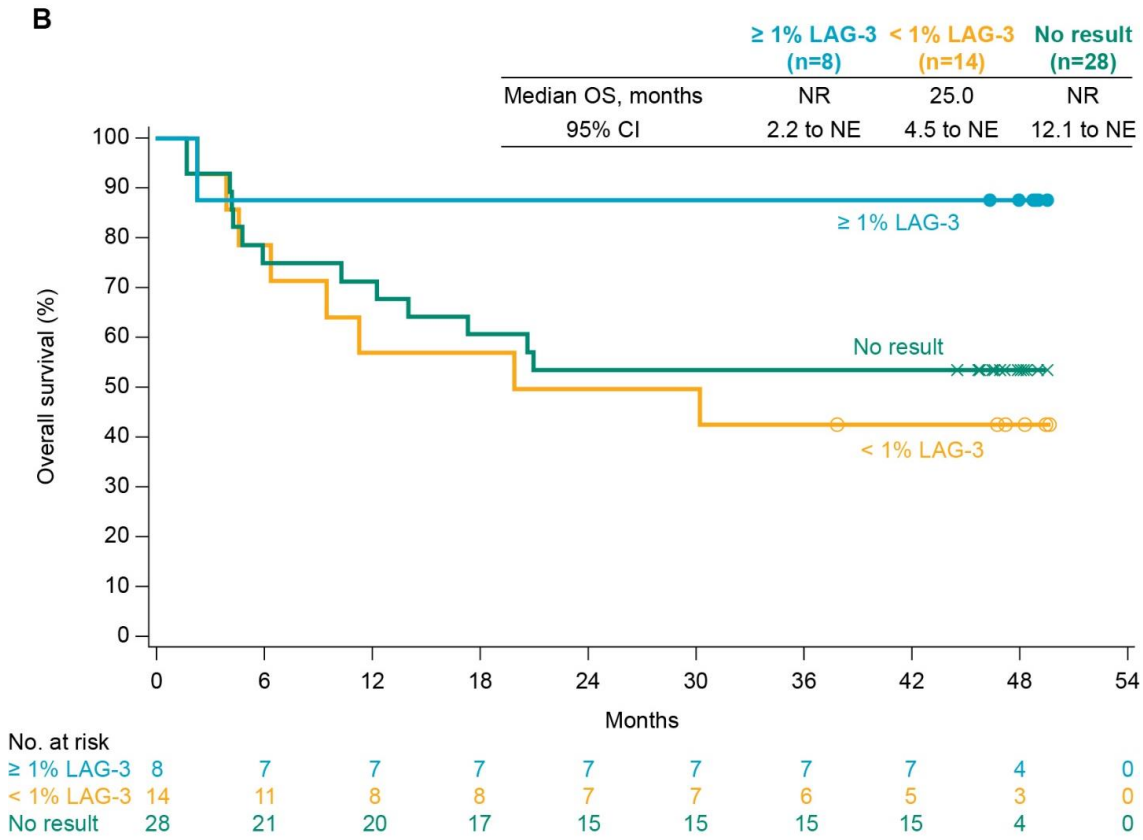



## CheckMate 142 Cohort 5 Manuscript – Final Draft

**Figure S2** A) Kaplan-Meier curve of progression-free survival per investigator by baseline tumor cell PD-L1 expression status. B) Kaplan-Meier curve of overall-survival per investigator by baseline tumor cell PD-L1 expression status. Symbols represent censored observations. PD-L1, programmed death ligand 1.

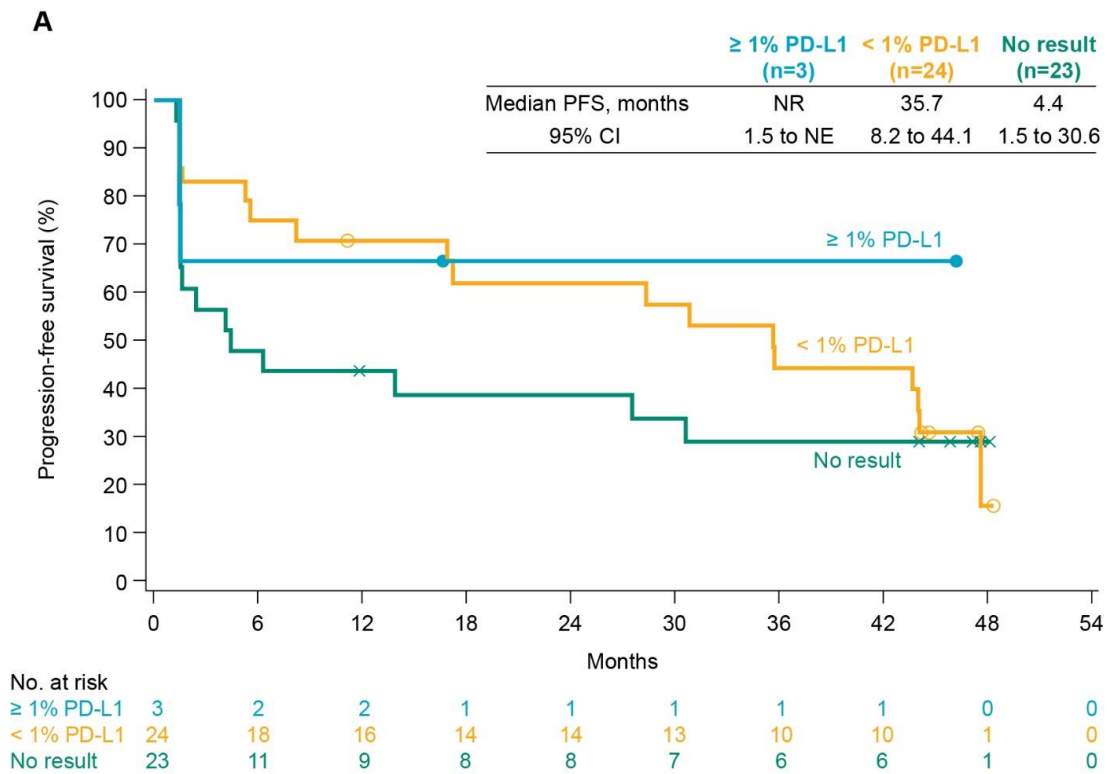

**CheckMate 142 Cohort 5 Manuscript – Final Draft**

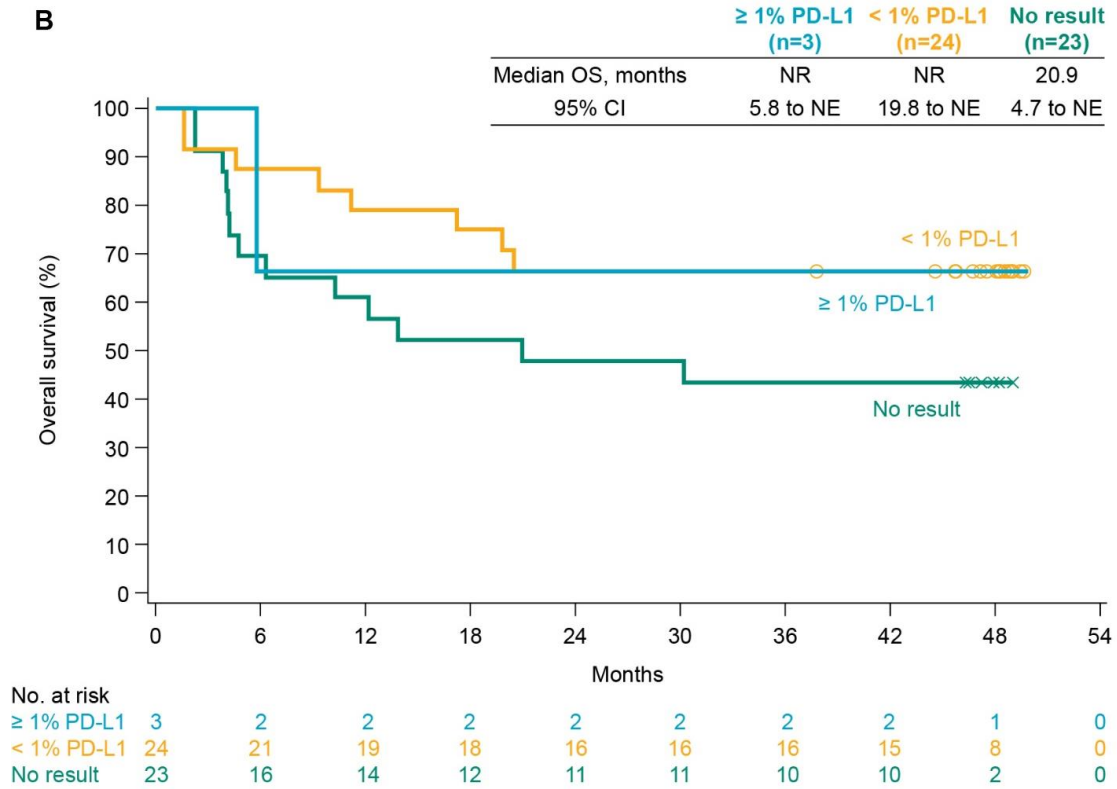

Supplement: jitc-2023-008689supp001.pdf [file jitc-2023-008689supp001.pdf]
